# Supplementary material for: Low-dose azacitidine, pioglitazone and all-trans retinoic acid is safe in patients aged ≥60 years with acute myeloid leukemia refractory to standard induction chemotherapy (AMLSG 26-16/AML-ViVA): results of the safety run-in phase
Source: PubMed Central journal article supplement — Haematologica. 2023 Oct 26;109(4):1274–8. doi: 10.3324/haematol.2023.283864 (PMC10985427; doi:10.3324/haematol.2023.283864), 2023-10-26

# Low-dose azacitidine, pioglitazone and all-*trans* retinoic acid is safe in patients aged $\geq 60$ years with acute myeloid leukemia refractory to standard induction chemotherapy (AMLSG 26-16/AML-ViVA): results of the safety run-in phase

Daniel Heudobler,<sup>1,2</sup> Florian Lüke,<sup>1,3</sup> Joachim Hahn,<sup>1</sup> Matthias Grube,<sup>1</sup> Pavla Schlosser,<sup>1</sup> Stephan Kremers,<sup>4</sup> Thomas Südhoff,<sup>5</sup> Jörg Westermann,<sup>6</sup> Marie Luise Hütter-Krönke,<sup>6,7</sup> Richard F. Schlenk,<sup>8,9</sup> Daniela Weber,<sup>7</sup> Peter Paschka,<sup>7</sup> Florian Zeman,<sup>10</sup> Hartmut Döhner,<sup>7</sup> Wolfgang Herr,<sup>1</sup> Albrecht Reichle<sup>1#</sup> and Simone Thomas<sup>1,11#</sup>

<sup>1</sup>University Hospital Regensburg, Department of Internal Medicine III, Hematology and Oncology, Regensburg; <sup>2</sup>Bavarian Center for Cancer Research, University Hospital Regensburg, Regensburg;

<sup>3</sup>Division of Personalized Tumor Therapy, Fraunhofer Institute for Toxicology and Experimental Medicine, Regensburg;

<sup>4</sup>Caritaskrankenhaus Lebach, Department of Hematology/Oncology, Lebach; <sup>5</sup>Klinikum Passau, Department Hematology and Oncology, Passau; <sup>6</sup>Charité - University Medical Center Berlin - Department of Hematology, Oncology and Tumor Immunology, Campus

Virchow-Klinikum, Berlin; <sup>7</sup>University Hospital Ulm, Department of Internal Medicine III, Ulm; <sup>8</sup>National Center of Tumor Diseases Trial Center, German Cancer Research Center and Heidelberg University Hospital, Heidelberg; <sup>9</sup>Heidelberg University Hospital, Department of Internal Medicine V, Heidelberg; <sup>10</sup>Center for Clinical Studies, University Hospital Regensburg, Regensburg and <sup>11</sup>Leibniz Institute for Immunotherapy, Division of Genetic Immunotherapy, Regensburg, Germany

*#AR and ST contributed equally as senior authors.*

Correspondence:

D. HEUDOBLER - daniel.heudobler@ukr.de

<https://doi.org/10.3324/haematol.2023.283864>

## Supplementary Data

**Supplementary Table 1: Adverse events on patient basis (n=10)**

|                                                              | <b>Safety population (N=10)</b>                |                     |
|--------------------------------------------------------------|------------------------------------------------|---------------------|
|                                                              | <b>Any Grade</b>                               | <b>Grade 3 or 4</b> |
|                                                              | <i>Number of patients with event (percent)</i> |                     |
| Anemia                                                       | 8 (80%)                                        | 6 (60%)             |
| Platelet count decreased                                     | 6 (60%)                                        | 4 (40%)             |
| White blood cell decreased                                   | 6 (60%)                                        | 5 (50%)             |
| Neutrophil count decreased                                   | 5 (50%)                                        | 5 (50%)             |
| Fever                                                        | 2 (20%)                                        | 2 (20%)             |
| Chills                                                       | 1 (10%)                                        |                     |
| Lung infection                                               | 4 (40%)                                        | 4 (40%)             |
| Urinary tract infection                                      | 3 (30%)                                        | 2 (20%)             |
| Sepsis                                                       | 1 (10%)                                        | 1 (10%)             |
| Nail infection                                               | 1 (10%)                                        |                     |
| Infections and infestations - Other                          | 3 (30%)                                        | 1 (10%)             |
| Epistaxis                                                    | 2 (20%)                                        |                     |
| Urinary urgency                                              | 1 (10%)                                        | 1 (10%)             |
| Renal and urinary disorders – Other (Urinary tract bleeding) | 1 (10%)                                        | 1 (10%)             |
| Gastric hemorrhage                                           | 1 (10%)                                        | 1 (10%)             |
| Eye disorders – Others (retinal bleeding)                    | 1 (10%)                                        |                     |
| Cough                                                        | 4 (40%)                                        |                     |
| Dyspnea                                                      | 3 (30%)                                        |                     |
| Hypokalemia                                                  | 4 (40%)                                        | 1 (10%)             |
| Fibrinogen decreased                                         | 1 (10%)                                        |                     |
| Investigations - Other (CRP increase): 12.38.1               | 1 (10%)                                        |                     |
| Iron overload                                                | 1 (10%)                                        | 1 (10%)             |
| Hyperthyroidism                                              | 1 (10%)                                        |                     |
| Pain                                                         | 7 (70%)                                        | 2 (20%)             |
| Bone pain                                                    | 1 (10%)                                        |                     |
| Arthralgia                                                   | 1 (10%)                                        |                     |
| Headache                                                     | 1 (10%)                                        |                     |
| Hypotension                                                  | 1 (10%)                                        |                     |
| Atrial flutter                                               | 1 (10%)                                        |                     |
| Thromboembolic event                                         | 2 (20%)                                        | 2 (20%)             |
| Edema limbs                                                  | 3 (30%)                                        |                     |
| Edema trunk                                                  | 1 (10%)                                        |                     |
| Diarrhea                                                     | 2 (20%)                                        |                     |
| Constipation                                                 | 2 (20%)                                        | 1 (10%)             |
| Gastrointestinal pain                                        | 1 (10%)                                        |                     |
| Gastrointestinal disorders – Other (decrease of appetite)    | 2 (20%)                                        |                     |
| Nausea                                                       | 1 (10%)                                        |                     |
| Vomiting                                                     | 1 (10%)                                        |                     |
| Weight loss                                                  | 1 (10%)                                        |                     |
| Fatigue                                                      | 1 (10%)                                        |                     |
| General disorders and administration site conditions - Other | 2 (20%)                                        |                     |
| Insomnia                                                     | 2 (20%)                                        | 1 (10%)             |
| Skin and subcutaneous tissue disorders                       | 3 (30%)                                        |                     |
| Skin ulceration                                              | 1 (10%)                                        |                     |
| Wound complication                                           | 1 (10%)                                        | 1 (10%)             |
| Allergic reaction                                            | 1 (10%)                                        |                     |

|                                               |         |         |
|-----------------------------------------------|---------|---------|
| Injection site reaction                       | 1 (10%) |         |
| Dizziness                                     | 2 (20%) |         |
| Nervous system disorders - Other              | 1 (10%) | 1 (10%) |
| Depression                                    | 1 (10%) |         |
| Psychiatric disorders – Others (panic attack) | 1 (10%) |         |

Supplementary Figure 1: Kaplan-Meier plot for overall survival (n=9)

### Overall Survival

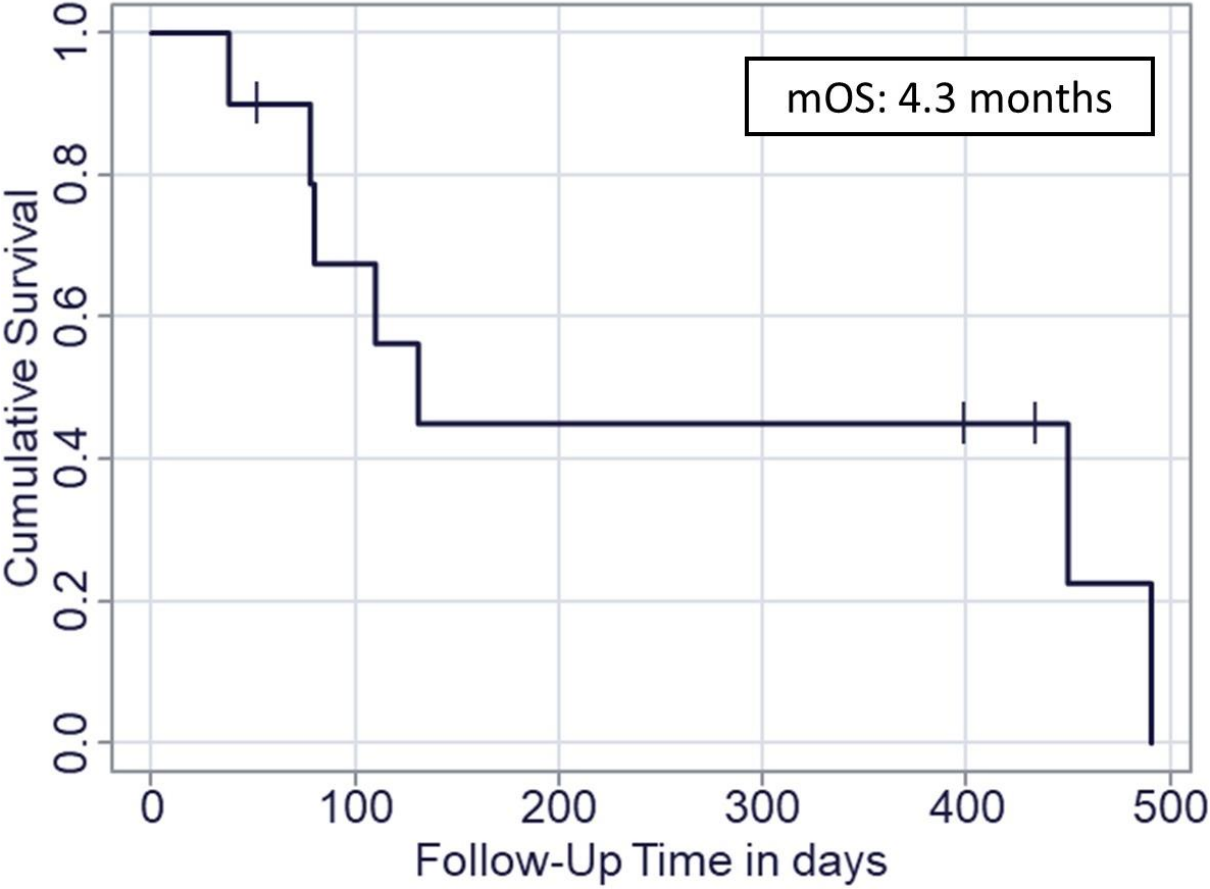

**Supplementary Figure 2:** Resolution of fungal pneumonia in patient 4. CT scan of the thorax shows pulmonary infiltrates in the right lung at baseline. During/after cycle 2 of AML-ViVA treatment CT scan demonstrates resolution of infiltrates.

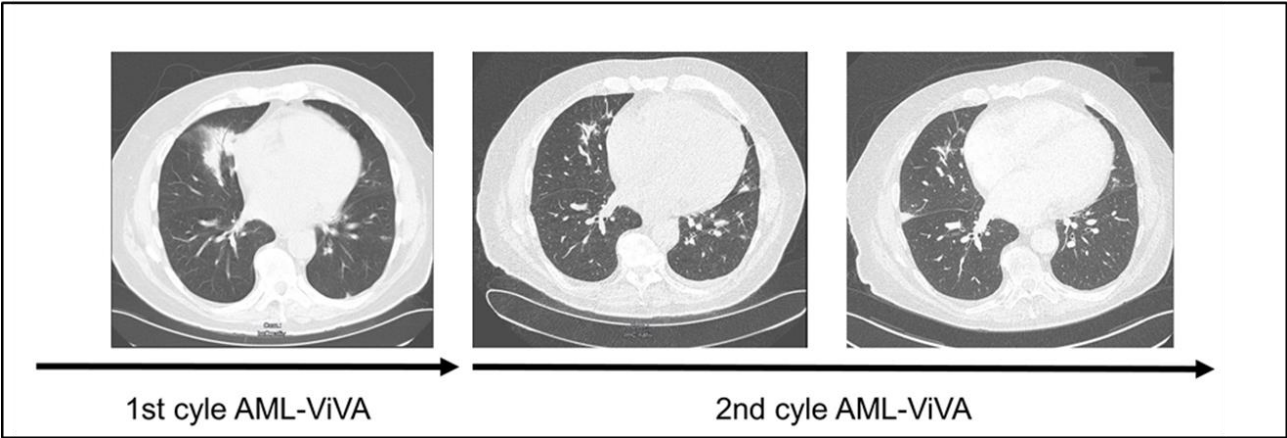

Supplement: 2023_283864_HEUDOBLER_SUPPL.pdf [file 2023_283864_HEUDOBLER_SUPPL.pdf]
